# Supplementary material for: Optimizing the Rheological and Thermal Behavior of Polypropylene-Based Composites for Material Extrusion Additive Manufacturing Processes
Source: MDPI journal article supplement (doi:10.3390/polym15102263), 2023-05-11
Supplement: s1 [file s1]

## Supplementary Material

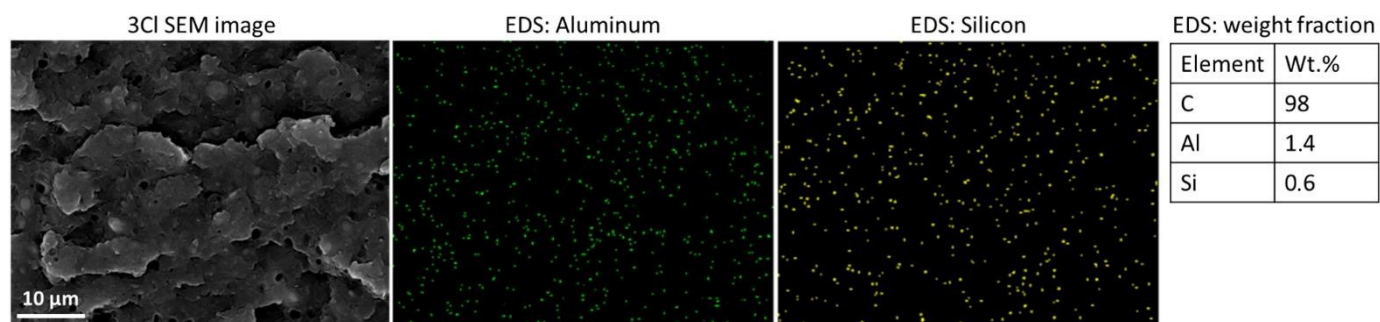

**Figure S1.** Al and Si EDS mapping on the SEM image of 3CI and weight fraction of the detected elements.

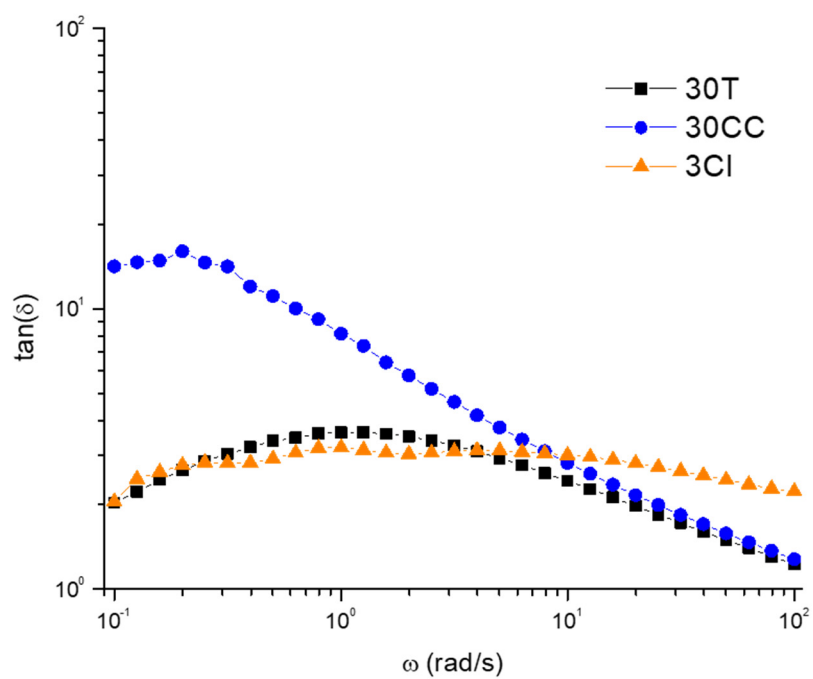

**Figure S2.**  $\tan\delta$  as a function of frequency for PP-based materials. The curves were recorded at 200 °C.
